# Supplementary material for: Application of a 72 h National Early Warning Score and Incorporation with Sequential Organ Failure Assessment for Predicting Sepsis Outcomes and Risk Stratification in an Intensive Care Unit: A Derivation and Validation Cohort Study
Source: MDPI journal article supplement (doi:10.3390/jpm11090910), 2021-09-13
Supplement: s1 [file s1]

## Supplement

Table. S1 Comparison of discrimination for mortality at different times

| AUC/cut-off point   | APACHEII     | Adm-qSOFA  | Adm-SOFA     | Adm-NEWS2    | <i>p</i> -Value    |
|---------------------|--------------|------------|--------------|--------------|--------------------|
| Mortality in Day 7  | 0.578 / >25  | 0.537 / >1 | 0.629* / >10 | 0.566 / >8   | 0.014 <sup>a</sup> |
| Mortality in Day 14 | 0.552 / >21  | 0.520 / >2 | 0.625* / >11 | 0.568* / >8  | 0.012 <sup>a</sup> |
| Mortality in Day 21 | 0.569* / >24 | 0.528 / >2 | 0.600* / >11 | 0.581* / >11 | 0.042 <sup>a</sup> |
| Mortality in Day 28 | 0.566* / >24 | 0.525 / >1 | 0.593* / >12 | 0.569* / >11 | 0.040 <sup>a</sup> |

\*significance level

<sup>a</sup>significant difference was only shown between SOFA and qSOFA

AUC: area under the curve, Adm: admission, APACHEII: Acute Physiological Assessment and Chronic Health Evaluation II, SOFA: Sequential Organ Failure Assessment, NEWS2: National Early Warning Score 2

Table. S2 Comparison of discrimination from NEWS2 and SOFA at admission and on day 3

| AUC/cut-off point                | Adm-NEWS2    | Day-3 NEWS2 | Adm <sup>1</sup> -SOFA | Day-3 SOFA   |
|----------------------------------|--------------|-------------|------------------------|--------------|
| Mortality in Day 7               | 0.566* / >8  | 0.741* / >8 | 0.629* / >10           | 0.740* / >11 |
| Pairwise comparison <sup>2</sup> | p < 0.001    | p = 0.03    | p < 0.001              | -            |
| Mortality in Day 14              | 0.568* / >8  | 0.657* / >6 | 0.625* / >11           | 0.680* / >10 |
| Pairwise comparison <sup>2</sup> | p < 0.001    | p = 0.409   | p = 0.029              |              |
| Mortality in Day 21              | 0.581* / >11 | 0.669* / >6 | 0.600* / >11           | 0.684* / >8  |
| Pairwise comparison <sup>2</sup> | p = 0.005    | p = 0.052   | p < 0.001              |              |
| Mortality in Day 28              | 0.569* / >11 | 0.649* / >6 | 0.593* / >12           | 0.677* / >8  |
| Pairwise comparison <sup>2</sup> | p < 0.001    | p = 0.094   | p < 0.001              |              |

\*significance level

AUC: area under the curve, Adm: admission, APACHEII: Acute Physiological Assessment and Chronic Health Evaluation II, SOFA: Sequential Organ Failure Assessment, NEWS2: National Early Warning Score 2

Table S3. Mortality at different endpoints in derivation cohort

|                                      | Low-risk | Intermediate-risk | High-risk | <i>p</i> -Value |
|--------------------------------------|----------|-------------------|-----------|-----------------|
| Mortality within 7 days              | 1.6%     | 5.8%              | 26.4%     | <0.001*         |
| Mortality within 14 days             | 5.6%     | 15.4%             | 42.5%     | <0.001*         |
| Mortality within 21days              | 8.4%     | 22.9%             | 49.4%     | <0.001*         |
| Mortality within 28 days             | 12.2%    | 26.0%             | 56.3%     | <0.001*         |
| *Significant difference among groups |          |                   |           |                 |

Table S4. Mortality at different endpoints in validation cohort

|                                      | Low-risk | Intermediate-risk | High-risk | <i>p</i> -Value |
|--------------------------------------|----------|-------------------|-----------|-----------------|
| Mortality within 7 days              | 1.4%     | 5.8%              | 21.9%     | <0.001*         |
| Mortality within 14 days             | 4.1%     | 14.7%             | 32.8%     | <0.001*         |
| Mortality within 21days              | 8.1%     | 21.6%             | 43.8%     | <0.001*         |
| Mortality within 28 days             | 11.0%    | 38.4%             | 54.7%     | <0.001*         |
| *Significant difference among groups |          |                   |           |                 |

Table S5. Ventilator-days and ICU-days for different risk stratification

|                 | Low-risk      | Intermediate-risk | High-risk      | <i>p</i> -Value |
|-----------------|---------------|-------------------|----------------|-----------------|
| ICU-days        | 7.0(4.8-12.4) | 11.7(6.5-17.9)    | 14.0(6.6-23.3) | <0.001          |
| Ventilator-days | 9.1(5.0-22.0) | 15.0(7.8-30.9)    | 20.5(7.3-33.7) | <0.001          |

All values as median (IQR). ICU: intensive care unit.
